# Supplementary material for: Macroalgae Sargassum cristaefolium Extract Inhibits Proinflammatory Cytokine Expression in BALB/C Mice
Source: Hindawi journal article supplement (doi:10.1155/2020/9769454), 2020-10-10
Supplement: f1 [file 9769454.f1.pdf]

1 **Supplementary data**

2 **Figure S1.** MS<sup>1</sup>, MS<sup>2</sup> and structure of fucoxanthin in *S. cristaefolium*

3 **Figure S2.** MS<sup>1</sup>, MS<sup>2</sup> and structure of 2-monoolein in *S. cristaefolium*

4 **Figure S3.** MS<sup>1</sup>, MS<sup>2</sup> and structure of 13-docosenamide in *S. cristaefolium*

5 **Figure S4.** Extracted chromatogram, MS<sup>1</sup> and MS<sup>2</sup> of Unidentified 1

6 **Figure S5.** Extracted chromatogram, MS<sup>1</sup> and MS<sup>2</sup> of Unidentified 2

7 **Figure S6.** Extracted chromatogram, MS<sup>1</sup> and MS<sup>2</sup> of Unidentified 3

8 **Table S1.** Primer specifications

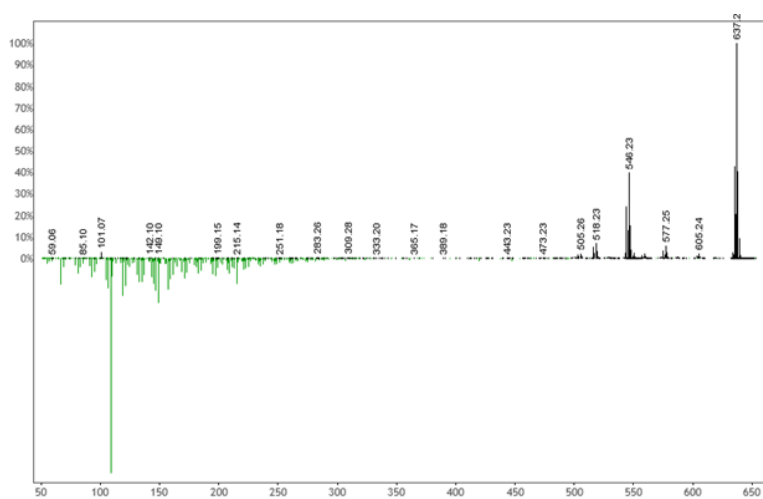

13  
14 (a)

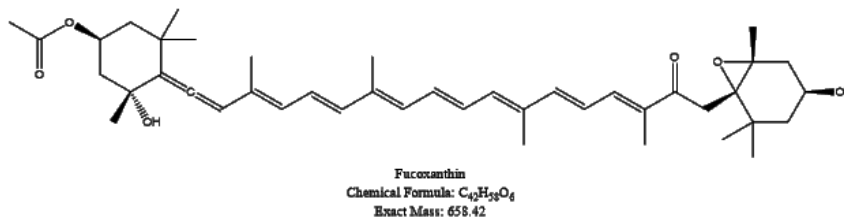

15  
16  
17  
18 (b)

19 **Figure S1.** Identification of fucoxanthin from *Sargassum cristaefolium* with m/z 659.4306.

20 (a) Mirror match MS<sup>2</sup> data with MASST spectrum from GNPS library (green line) with

21 cosine score of 0.84. (b) fucoxanthin structure, formula, and exact mass.

22  
23  
24  
25  
26

27  
28  
29  
30  
31  
32  
33  
34  
35

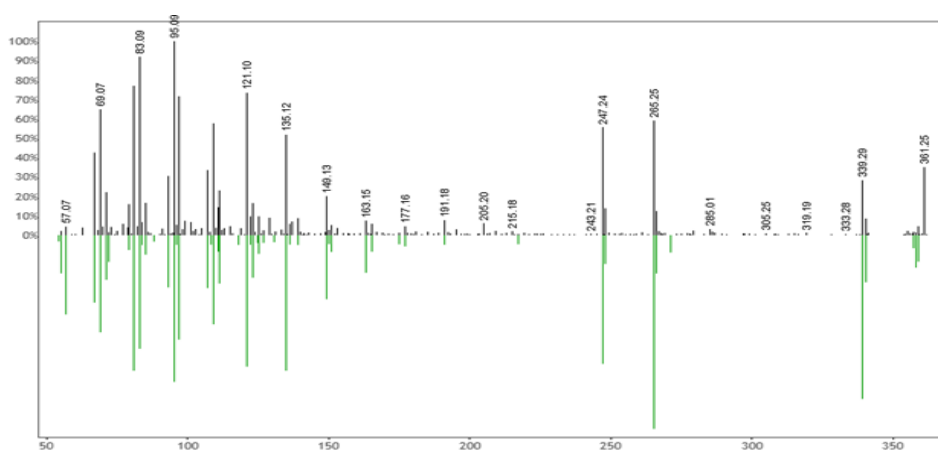

36  
37

(a)

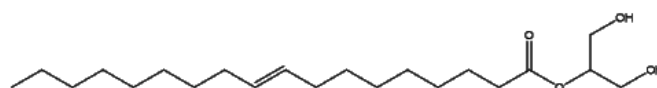

2-Monoolein  
Chemical Formula:  $C_{27}H_{48}O_4$   
Exact Mass: 356.29

38  
39  
40

(b)

41 **Figure S2.** Identification of 2-monoolein from *Sargassum cristaefolium* with m/z 357.3001  
42 (a) Mirror match  $MS^2$  data with MASST spectrum from GNPS library (green line) with  
43 cosine score of 0.93. (b) 2-monoolein structure, formula, and exact mass.

44  
45  
46  
47  
48  
49  
50  
51  
52  
53  
54

55  
56  
57  
58

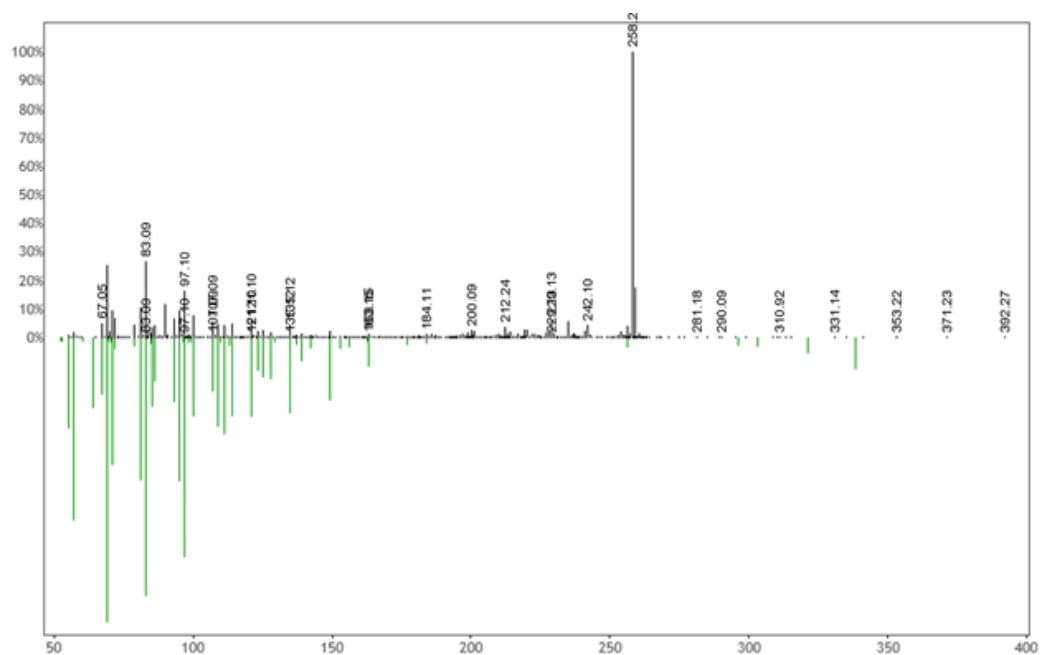

(a)

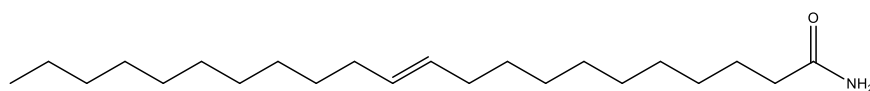

13-docosenamide  
Chemical Formula:  $C_{22}H_{43}NO$   
Exact Mass: 337.33

(b)

59  
60  
61  
62  
63  
64  
65  
66  
67  
68  
69  
70  
71  
72  
73  
74  
75  
76  
77  
78

**Figure S3.** Identification of 13-docosenamide from *Sargassum cristaefolium* with  $m/z$  338.3417. (a) Mirror match  $MS^2$  data with MASST spectrum from GNPS library (green line) with cosine score of 0.79. (b) 13-docosenamide structure, formula, and exact mass.

79  
80  
81  
82  
83  
84  
85

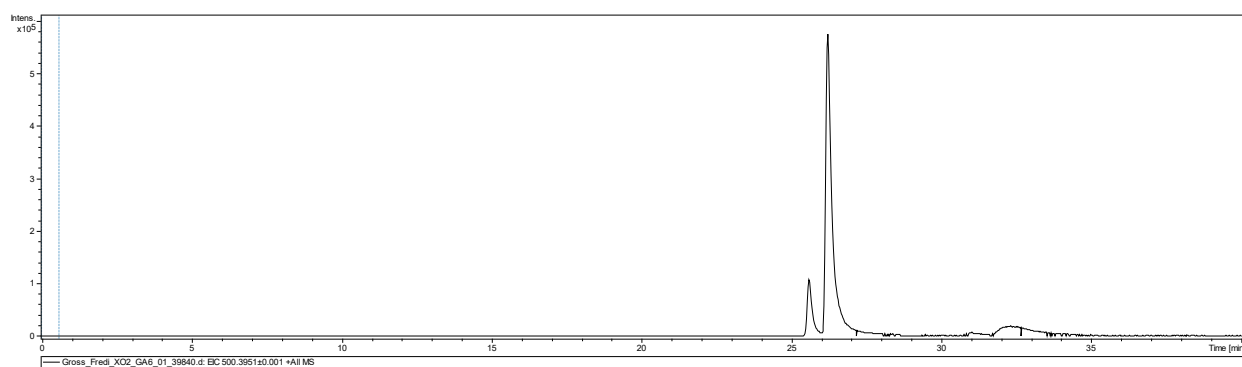

86

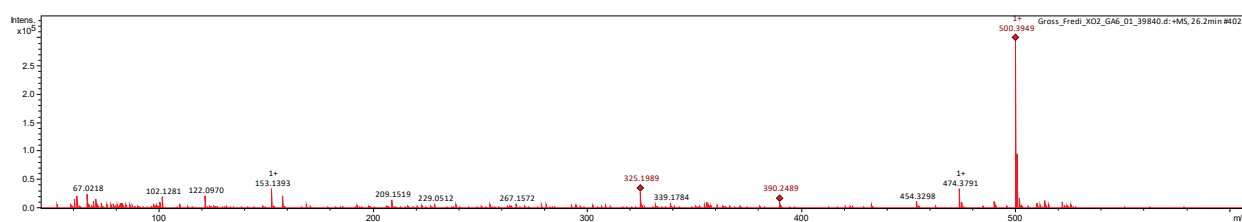

87

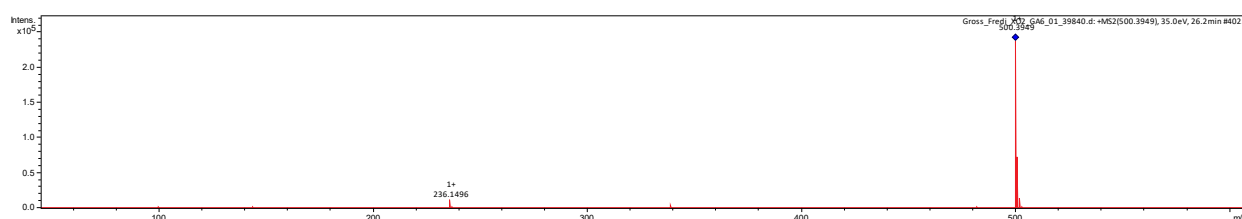

88

89

90 **Figure S4.** From up to down extracted chromatogram, MS<sup>1</sup> and MS<sup>2</sup>, respectively, of  
91 unknown compound with m/z 500.3951

92

93

94

95

96

97

98

99

100

101

102

103  
104  
105  
106

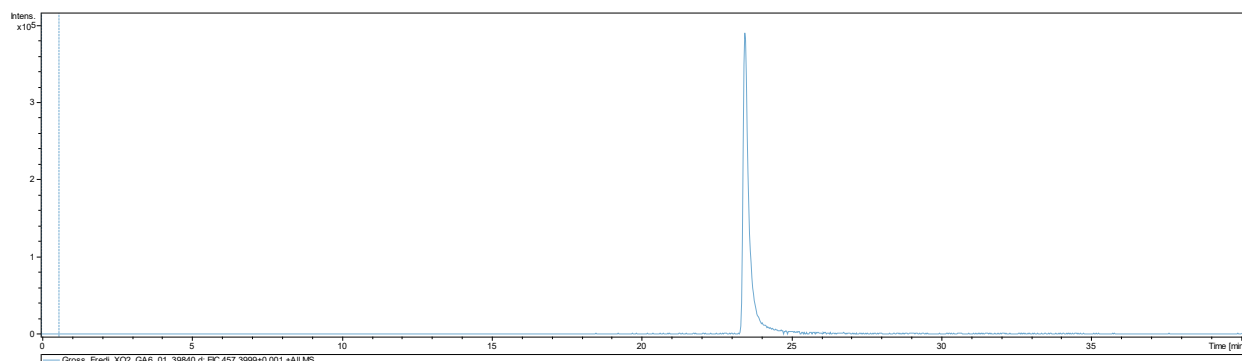

107  
108

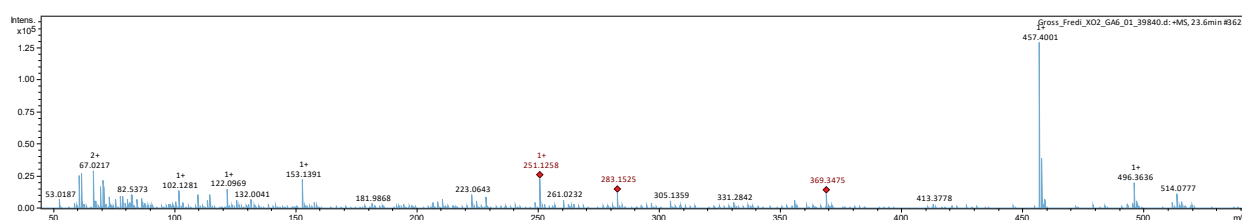

109

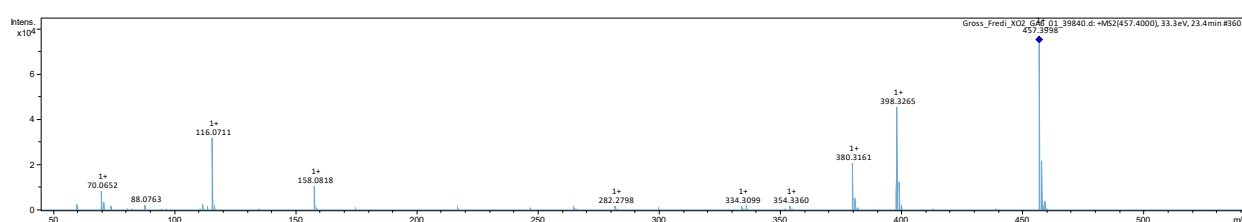

110

111 **Figure S5.** From up to down extracted chromatogram, MS1 and MS2, respectively, of  
112 unknown compound with m/z 457.3998

113  
114  
115  
116  
117  
118  
119  
120  
121  
122  
123  
124  
125  
126

127  
128  
129  
130

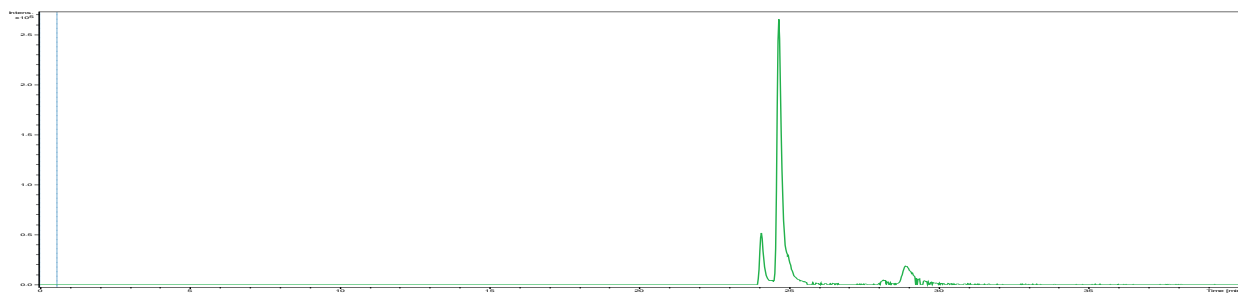

131

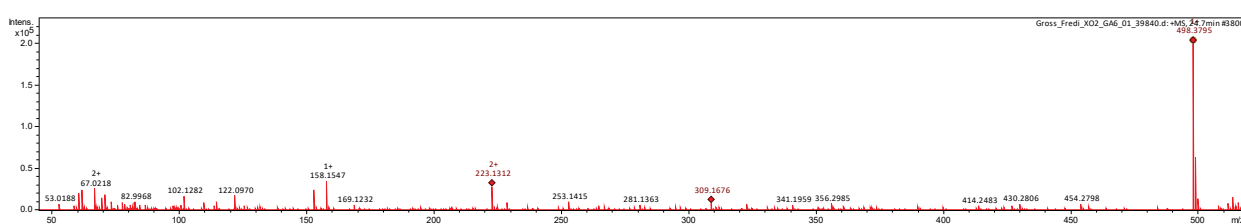

132

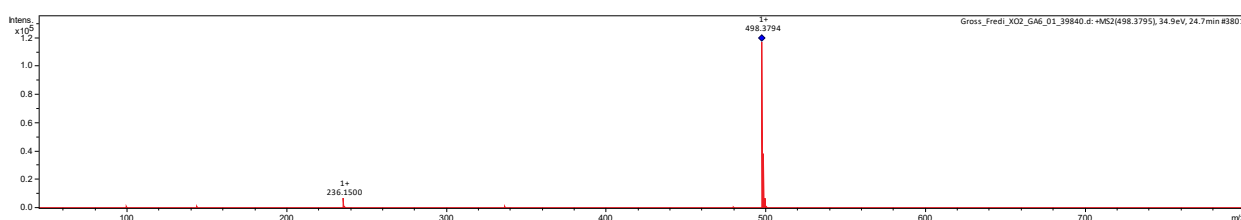

133

134 **Figure S6.** From up to down extracted chromatogram, MS1 and MS2, respectively, of  
135 unknown compound with m/z 498.3794.

136  
137  
138  
139  
140  
141  
142  
143  
144  
145  
146  
147  
148  
149  
150  
151  
152

153  
154**Table S1. Primer Specifications**

| <b>Primer</b>   | <b>Sequence</b>      | <b>Product size</b> |
|-----------------|----------------------|---------------------|
| TNF- $\alpha$ F | AGCCCCCAGTCTGTATCCTT | 212 bp              |
| TNF- $\alpha$ R | CTCCCTTTGCAGAACTCAGG |                     |
| IL-6 F          | GAGCCCACCAAGAACGATAG | 229 bp              |
| IL-6 R          | TCCACGATTTCCCAGAGAAC |                     |
| IL-10 F         | CCAGGGAGATCCTTTGATGA | 173 bp              |
| IL-10 R         | CATTCCCAGAGGAATTGCAT |                     |
| Gapdh           | AACTTTGGCATTGTGGAAGG | 223 bp              |
| Gapdh           | ACACATTGGGGGTAGGAACA |                     |

155  
156
